# Supplementary material
Source: PubMed Central journal article supplement (PMC374341)
Supplement: pnas_101_11_3898__1.pdf [file pnas_101_11_3898__1.pdf]

|   |   |   |   |   |   |   |   |   |   |   |   |   |
|---|---|---|---|---|---|---|---|---|---|---|---|---|
| D | X | O | X | O | X | O | X | O | X | O | X | O |
| E | X | O | X | O | X | O | X | O | X | O | X | O |
| F | X | O | X | O | X | O | X | O | X | O | X | O |
| G | X | O | X | O | X | O | X | O | X | O | X | O |
| H | X | O | X | O | X | O | X | O | X | O | X | O |

### FACS tube staining option

1. For fewer samples, staining in a FACS tube may be faster. This allows for fewer spins -- only one large volume wash is needed.
2. Place stain in the bottom of a FACS tube on ice.
3. Add cells directly to the stain, mix well and incubate on ice for 15 min.
4. Add 4 ml of staining media and centrifuge.
5. Aspirate cells and resuspend in 200 ul fixing solution.
6. Store cells covered at 4C until analysis.

### Recipes:

#### Staining media: deficient hRPMI

3% NCS

0.02% Azide (1/500 of 10% stock)

optional: 1mM EDTA (mouse/clumpy cells only)

#### Fixing solution: deficient hRPMI

0.5% paraformaldehyde (1/8 of 4% stock)

#### Paraformaldehyde (4%)

*Paraformaldehyde is very toxic and aerates easily. Avoid breathing in the powder. Use a fume hood if necessary.*

1. Mix required amount of paraformaldehyde (4g/100ml) to 2/3 final volume in ddH<sub>2</sub>O.
2. Heat to 60C while stirring in a fume hood (monitor temperature with thermometer).
3. Add 1 drop 2N NaOH to clear the solution.
4. Remove heat and add 1/3 vol 3x PBS.
5. Let cool and adjust to pH 7.2 with HCL.
6. Filter.
